# Supplementary material
Source: Research Square preprint supplement (doi:10.21203/rs.3.rs-9650677/v1)
Supplement: Supplementary file 1 [file 3539c4bc63fa296e7235395b.docx]

**Cystic Fibrosis Restricts Systemic and Local Lipid Fluxes during Lung Infection**

Ella Haracic1, Nicole Reyne2,6, Dylan De Bellis3, Sara J. Fraser-Miller1, Paul Trim4, Alexanda McCarron2,6, Tyren M. Dodgen5, Brynley J. Davies1, Jack K. Waters1, Bernadette Boog2,6, David Parsons2,6, John Widger6, Marten Snel4, Shailesh Bihari3,7, Dani-Louise Dixon3, Martin Donnelley2,6* and Bart A. Eijkelkamp1*.

1 College of Science and Engineering, Flinders University, Bedford Park, SA, Australia.

2 School of Medicine and Robinson Research Institute, College of Health, Adelaide University, Adelaide, South Australia, Australia.

3 College of Medicine and Public Health, Flinders University, Bedford Park, SA, Australia.

4 Metabolomics and MS-Imaging Core Facility, South Australian Health and Medical Research Institute, Adelaide, SA, Australia.

5 Waters Corporation, Rydalmere, NSW, Australia.

6 Women’s and Children’s Hospital, Adelaide, SA, Australia.

7 Intensive Care Unit, Flinders Medical Centre, South Australia

**Running Title:** CF Impedes Lipid Fluxes

* **Corresponding authors:** Bart Eijkelkamp. College of Science and Engineering, Flinders University, Adelaide, South Australia, 5042, Australia. Phone: +61-8-8201-7779. Email: [bart.eijkelkamp@flinders.edu.au](mailto:bart.eijkelkamp@flinders.edu.au). Martin Donnelley. School of Medicine and Robinson Research Institute, College of Health, Adelaide University, Adelaide, South Australia, Australia. [martin.donnelley@adelaide.edu.au](mailto:martin.donnelley@adelaide.edu.au).

**Supplementary Table 1: Fatty acid composition of the 15% lard and 15% fish oil enriched diets.**

| Calculated Fatty Acid Composition as Fed | | |
| --- | --- | --- |
|  | **15% lard enriched diet** | **15% fish oil enriched diet** |
| Saturated Fats C12:0 and less | 0.05% | No data |
| Myristic Acid 14:0 | 0.23% | 0.44% |
| Palmitic Acid 16:0 | 3.96% | 2.74% |
| Stearic Acid 18:0 | 2.57% | 0.76% |
| Oleic Acid 18:1 | 5.06% | 1.94% |
| Gadoleic Acid 20:1 | 0.11% | 0.11% |
| Linoleic Acid 18:2 n6 | 2.17% | 0.48% |
| a Linolenic Acid 18:3 n3 | 0.30% | 0.06% |
| Arachidonic Acid 20:4 n6 | No data | 0.24% |
| EPA 20:5 n3 | No data | 0.86% |
| DHA 22:6 n3 | No data | 3.75% |
| Total n3 | 0.30% | 5.23% |
| Total n6 2.18% | 2.18% | 1.00% |
| Total Monounsaturated Fats | 5.48% | 3.40% |
| Total Polyunsaturated Fats | 2.56% | 6.28% |
| Total Saturated Fats | 6.95% | 4.39% |

**Supplementary Table 2: Oligonucleide sequences used for qRT-PCR.**

|  | Sequence (5’ – 3’) | Tm (°C) | Ta (°C) | Product size (bp) |
| --- | --- | --- | --- | --- |
| *gapdh* | | | | |
| Forward | GGGTGTGAACCACGAGAAAT | 63.3 | 63.3 | 156 |
| Reverse | CCACAGTCTTCTGAGTGGCA | 64.8 |
| *fasn* | | | | |
| Forward | GGATGGTGGTTTCCTGCTAA | 77.7 | 64.2 | 169 |
| Reverse | GCAGTGCCTTCCTTGAGAAC | 64.2 |


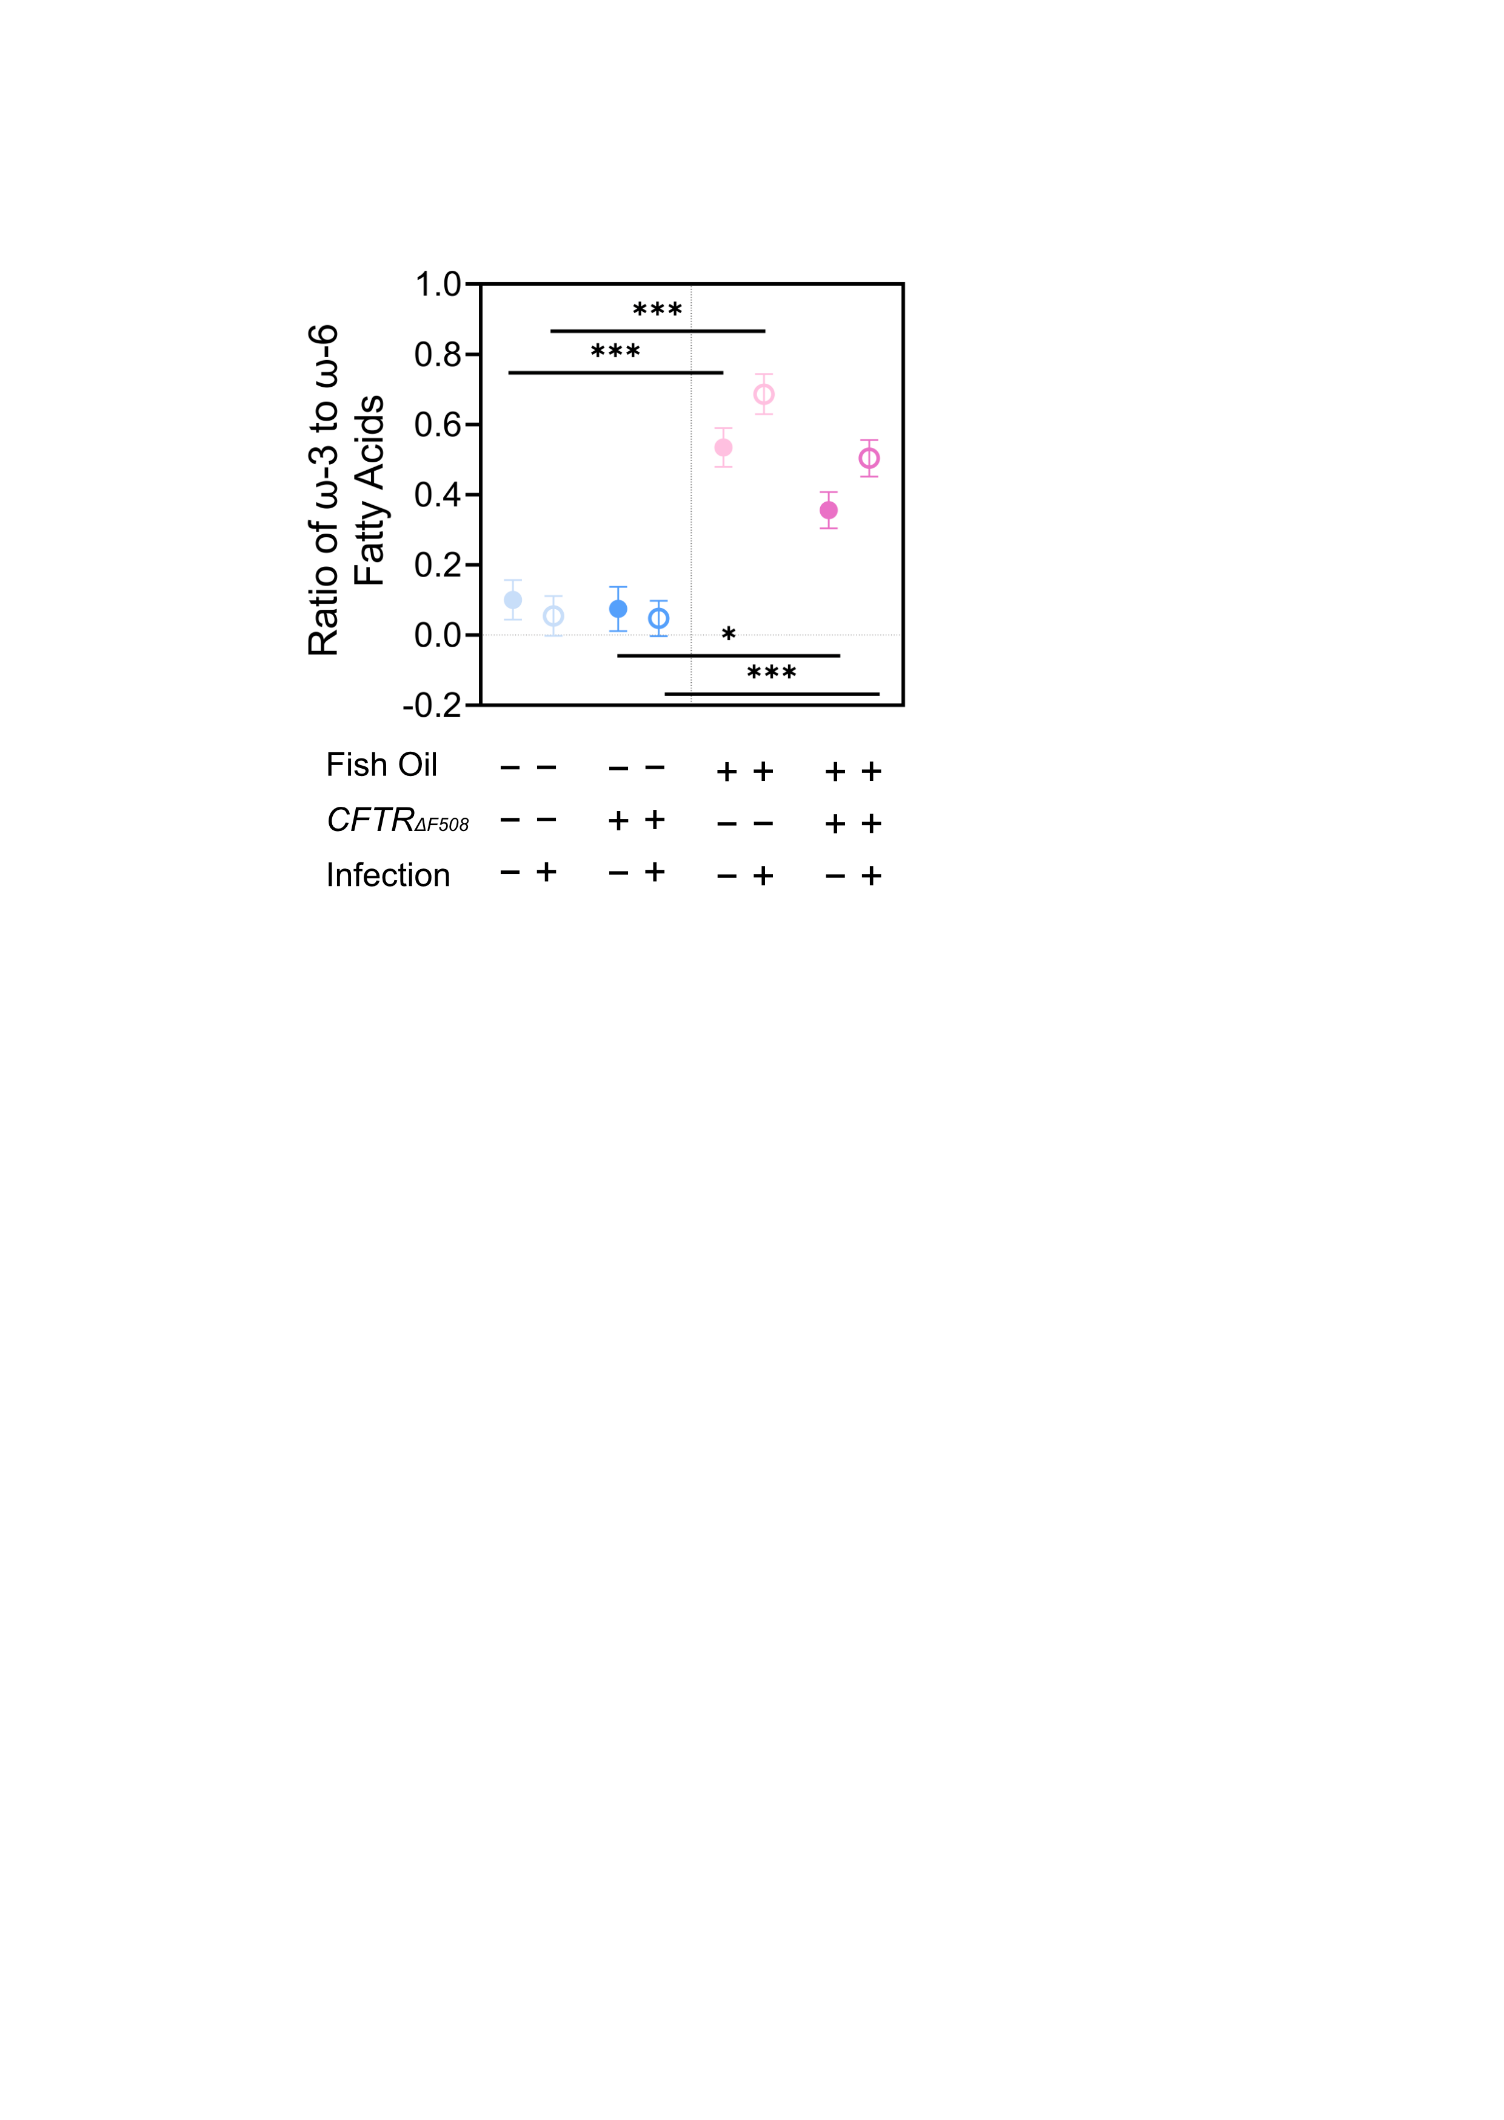


**Supplementary Figure 1: The ratio of circulating ω-3:ω-6 fatty acids.** The calculated ratio of the absolute abundance of C18:2ω-6 and C20:4ω-6 to C22:6ω-3 in the plasma identified via GC-MS. Results are representative of at least 4 biological replicates. Plots show model-adjusted estimated marginal means (±95% CI). Statistical analyses used factorial linear models with fixed effects of genotype, infection status and diet; *p* < 0.05, * and *p* < 0.0005, ***.


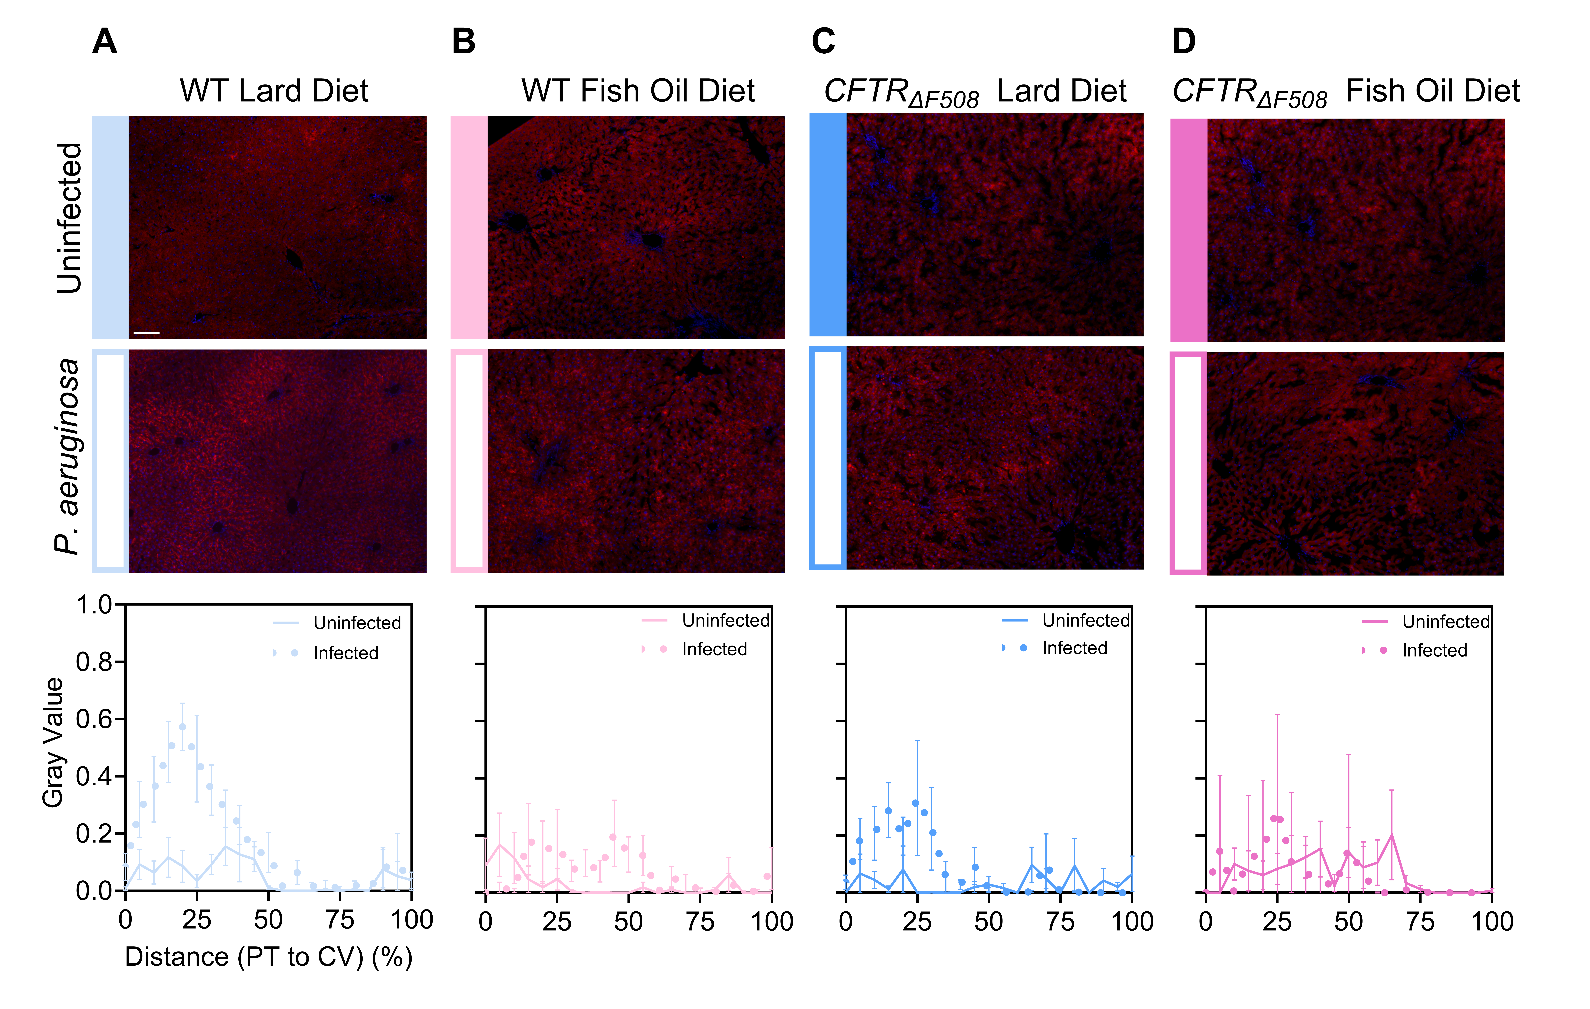


**Supplementary Figure 2: Visualisation of hepatic lipid droplets.** Nile red and DAPI stained liver tissue (sectioned at 10 µm) for (A) WT animals fed a 15% lard diet, (B) WT animals fed a 15% fish oil diet, (C) *CFTRΔF508*animals fed a 15% lard diet and (D) *CFTRΔF508*animals fed a 15% fish oil diet. Images were visualised using an Olympus AX70 fluorescent microscope and false coloured using ImageJ (FIJI). The asterisks denote the central vein (scalebar = 100 μm). ImageJ analyses of lipid droplets located from the portal triad to central vein.


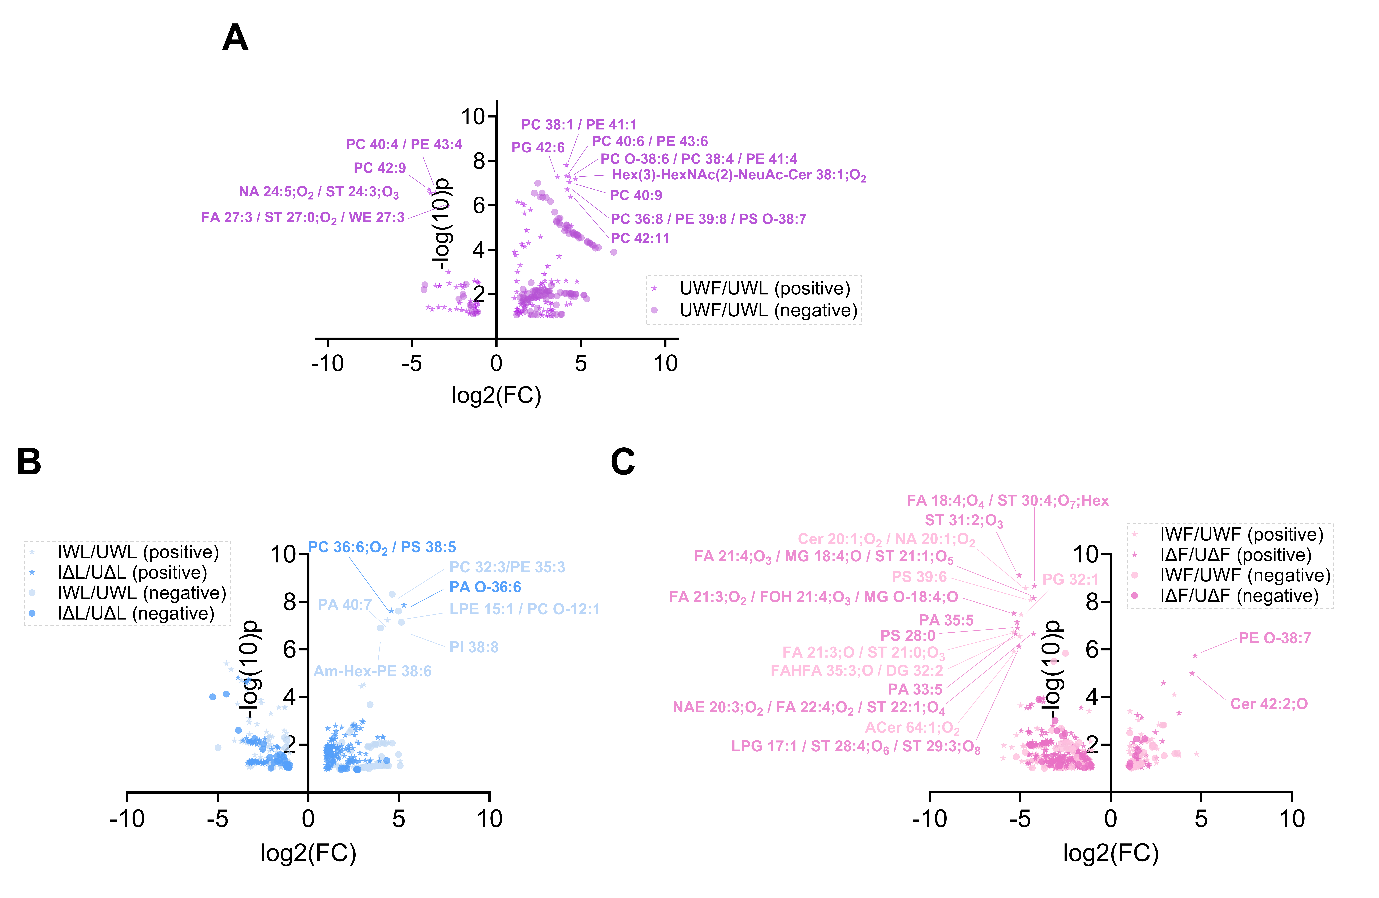


**Supplementary Figure 3: The influence of diet and *P. aeruginosa* infection on the lung lipidome** (A) The influence of diet on the lung lipidome in uninfected WT rats. Overlay of ions detected from liquid MALDI-TOF in both positive and negative mode. UWF = uninfected WT rats on fish oil, UWL = uninfected WT rats on lard. (B) The influence of *P. aeruginosa* infectionon the lung lipidome in lard fed WT and *CFTRΔF508* rats. Overlay of ions detected from liquid MALDI-TOF in both positive and negative mode. IWL = Infected WT rats on lard, UΔL = uninfected *CFTRΔF508* rats on lard, IΔL = infected *CFTRΔF508* rats on lard. (C) The influence of *P. aeruginosa* infectionon the lung lipidome in fish oil fed WT and *CFTRΔF508* rats. Overlay of ions detected from liquid MALDI-TOF in both positive and negative mode. IWF = Infected WT rats on fish oil, UΔF = uninfected *CFTRΔF508* rats on fish oil, IΔF = infected *CFTRΔF508* rats on fish oil.


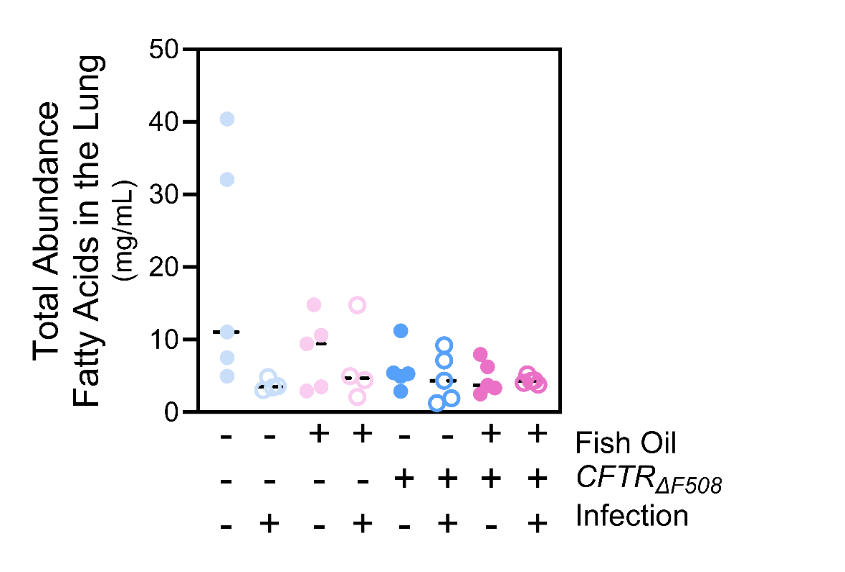


**Supplementary Figure 4: Observation of the pulmonary adipocyte heterogenous phenotype in uninfected WT lard rats.** The total absolute abundace of pulmonary fatty acids detected by GC-MS. Results are representative of 5 biological replicates except for infected WT rats on the fish oil diet, where there are 4 biological replicates.


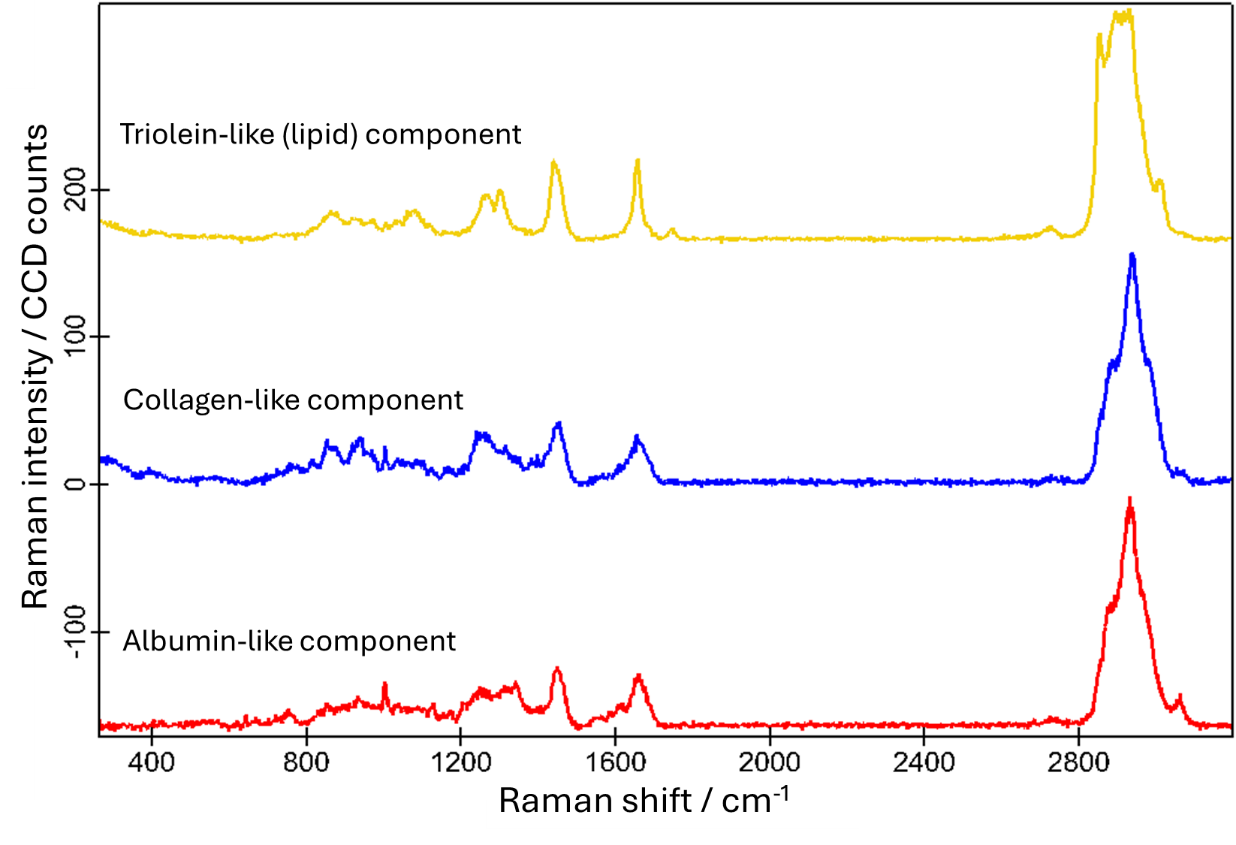


**Supplementary Figure 5: The Raman spectral component curves used to generate Raman-based false colour images shown in Figure 4.**
